# Supplementary material
Source: PubMed Central journal article supplement (PMC3568705)
Supplement: NIHMS318146-supplement-Supp_Figures.pdf [file NIHMS318146-supplement-Supp_Figures.pdf]

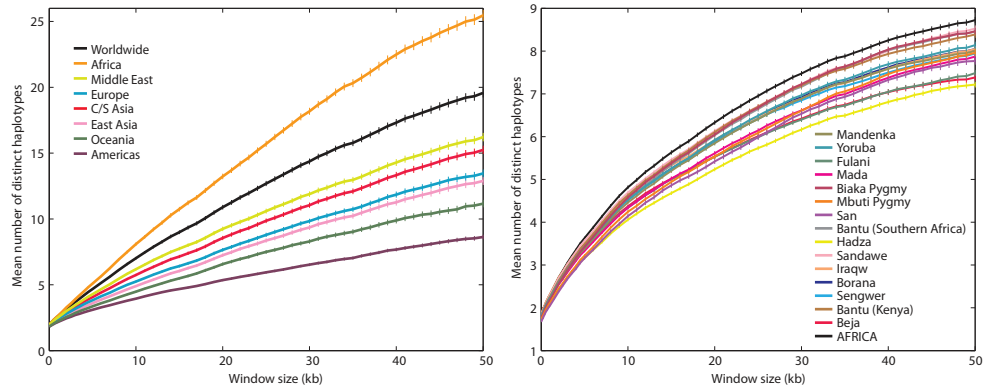

Figure S1: Numbers of distinct haplotypes. (A) The number of distinct haplotypes in each geographic region, and in the pooled worldwide collection, as a function of haplotype length. Sample sizes were adjusted to represent 54 chromosomes from each geographic region. (B) The number of distinct haplotypes in each African population, and in the pooled African population, as a function of haplotype length. Sample sizes were adjusted to represent 12 chromosomes from each population. Error bars represent the standard error of the mean across haplotype-loci.

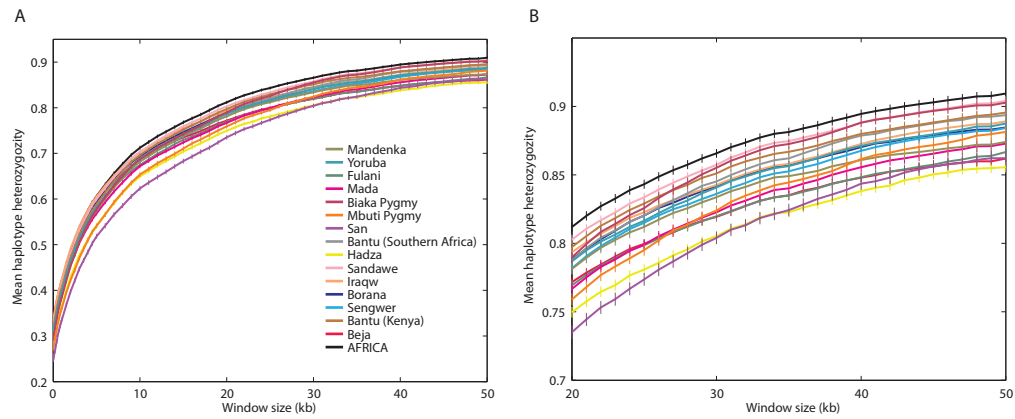

Figure S2: Haplotype heterozygosity in African populations. (A) Haplotype heterozygosity in each African population, and in the pooled African population, as a function of haplotype length. Sample sizes were adjusted to represent 12 chromosomes from each population. (B) An amplification of the upper right corner of part A. Error bars represent the standard error of the mean across haplotype-loci.
